# Supplementary material for: Biomechanical considerations are crucial for the success of tendon and meniscus allograft integration—a systematic review
Source: Springer Nature journal article supplement (doi:10.1007/s00167-018-5185-y), 2018-10-05
Supplement: MOESM1 [file 16176120]

Table 1 Search strategy for PubMed MEDLINE, performed on May 7, 2018

| No. | Operation | # Publications |
| --- | --- | --- |
| 1 | (("Composite Tissue Allografts"[Mesh] OR "Transplantation, Homologous"[Mesh] OR "Allografts"[Mesh]) OR (allograft*)) | 124064 |
| 2 | (("Biomechanical Phenomena"[Mesh] OR "Mechanics"[Mesh] OR "Hydrodynamics"[Mesh] OR "Shear Strength"[Mesh] OR "Tensile Strength"[Mesh] OR "Stress, Mechanical"[Mesh] OR "Osteoarthritis"[Mesh]) OR (biomechanic*)) | 272343 |
| 3 | (("Knee Joint"[Mesh] OR "Knee"[Mesh] OR "Arthroplasty, Replacement, Knee"[Mesh] OR "Medial Collateral Ligament, Knee"[Mesh] OR "Knee Injuries"[Mesh] OR "Osteoarthritis, Knee"[Mesh]) OR (knee*)) | 156092 |
| 4 | (("Meniscus"[Mesh] OR "Menisci, Tibial"[Mesh] OR "Tibial Meniscus Injuries"[Mesh] OR "Fibrocartilage"[Mesh] OR "Osteochondritis"[Mesh] OR "Medial Collateral Ligament, Knee"[Mesh] OR "Joint Loose Bodies"[Mesh]) OR (menisc*)) | 37921 |
| 5 | (("Ligaments"[Mesh] OR "Medial Collateral Ligament, Knee"[Mesh] OR "Patellar Ligament"[Mesh] OR "Anterior Cruciate Ligament"[Mesh] OR "Collateral Ligaments"[Mesh] OR "Posterior Cruciate Ligament"[Mesh] OR "Ligaments, Articular"[Mesh] OR "Anterior Cruciate Ligament Reconstruction"[Mesh] OR "Posterior Cruciate Ligament Reconstruction"[Mesh] OR "Anterior Cruciate Ligament Injuries"[Mesh] OR "Sprains and Strains"[Mesh] OR "Bone-Patellar Tendon-Bone Grafting"[Mesh] OR "Bone-Patellar Tendon-Bone Grafts"[Mesh]) OR (ligament*)) | 95893 |
| 6 | (("Tendons"[Mesh] OR "Hamstring Tendons"[Mesh] OR "Tendon Transfer"[Mesh] OR "Bone-Patellar Tendon-Bone Grafts"[Mesh] OR "Bone-Patellar Tendon-Bone Grafting"[Mesh] OR "Tendon Injuries"[Mesh] OR "Tendinopathy"[Mesh] OR "Patellar Ligament"[Mesh] OR "Tenotomy"[Mesh]) OR (tendon*)) | 80326 |
| 7 | #4 OR #5 OR #6 | 189130 |
| 8 | #1 AND #2 AND #3 AND #7 | 448 |
| 9 | LANGUAGE: ENG | 433 |
|  |  |  |
